# Supplementary material
Source: publisher site journal article supplement (https://www.dovepress.com/article/584698)
Supplement: Supplementary file 1 [file 584698%20Supplementary%20Material_1.docx]

*Supplemental materials*

**Construction and Validation of a Predictive Model for Post-TACE Recurrence Risk in Hepatocellular Carcinoma: A Retrospective Cohort Study**

**Supplementary figures legend**

**Supplementary Figure S1** Venn diagram of univariate Cox regression and LASSO analysis.

**Supplementary Figure S2** Calibration curve of prognostic nomogram. **(A)** calibration curve of training set and **(B)** calibration curve of validation set.

**Supplementary Figure S3** DCA curve of validation set. **(A-D)** DCA curves of validation sets at 6 months **(A)**, 1 year **(B)**, 18 months **(C)** and 2 years **(D)**.

**Supplementary tables legend**

**Table S1**: Head-to-head C-index data of the training set.

**Table S2**: Head-to-head C-index data of the validation set.

**Supplementary Figure S1**


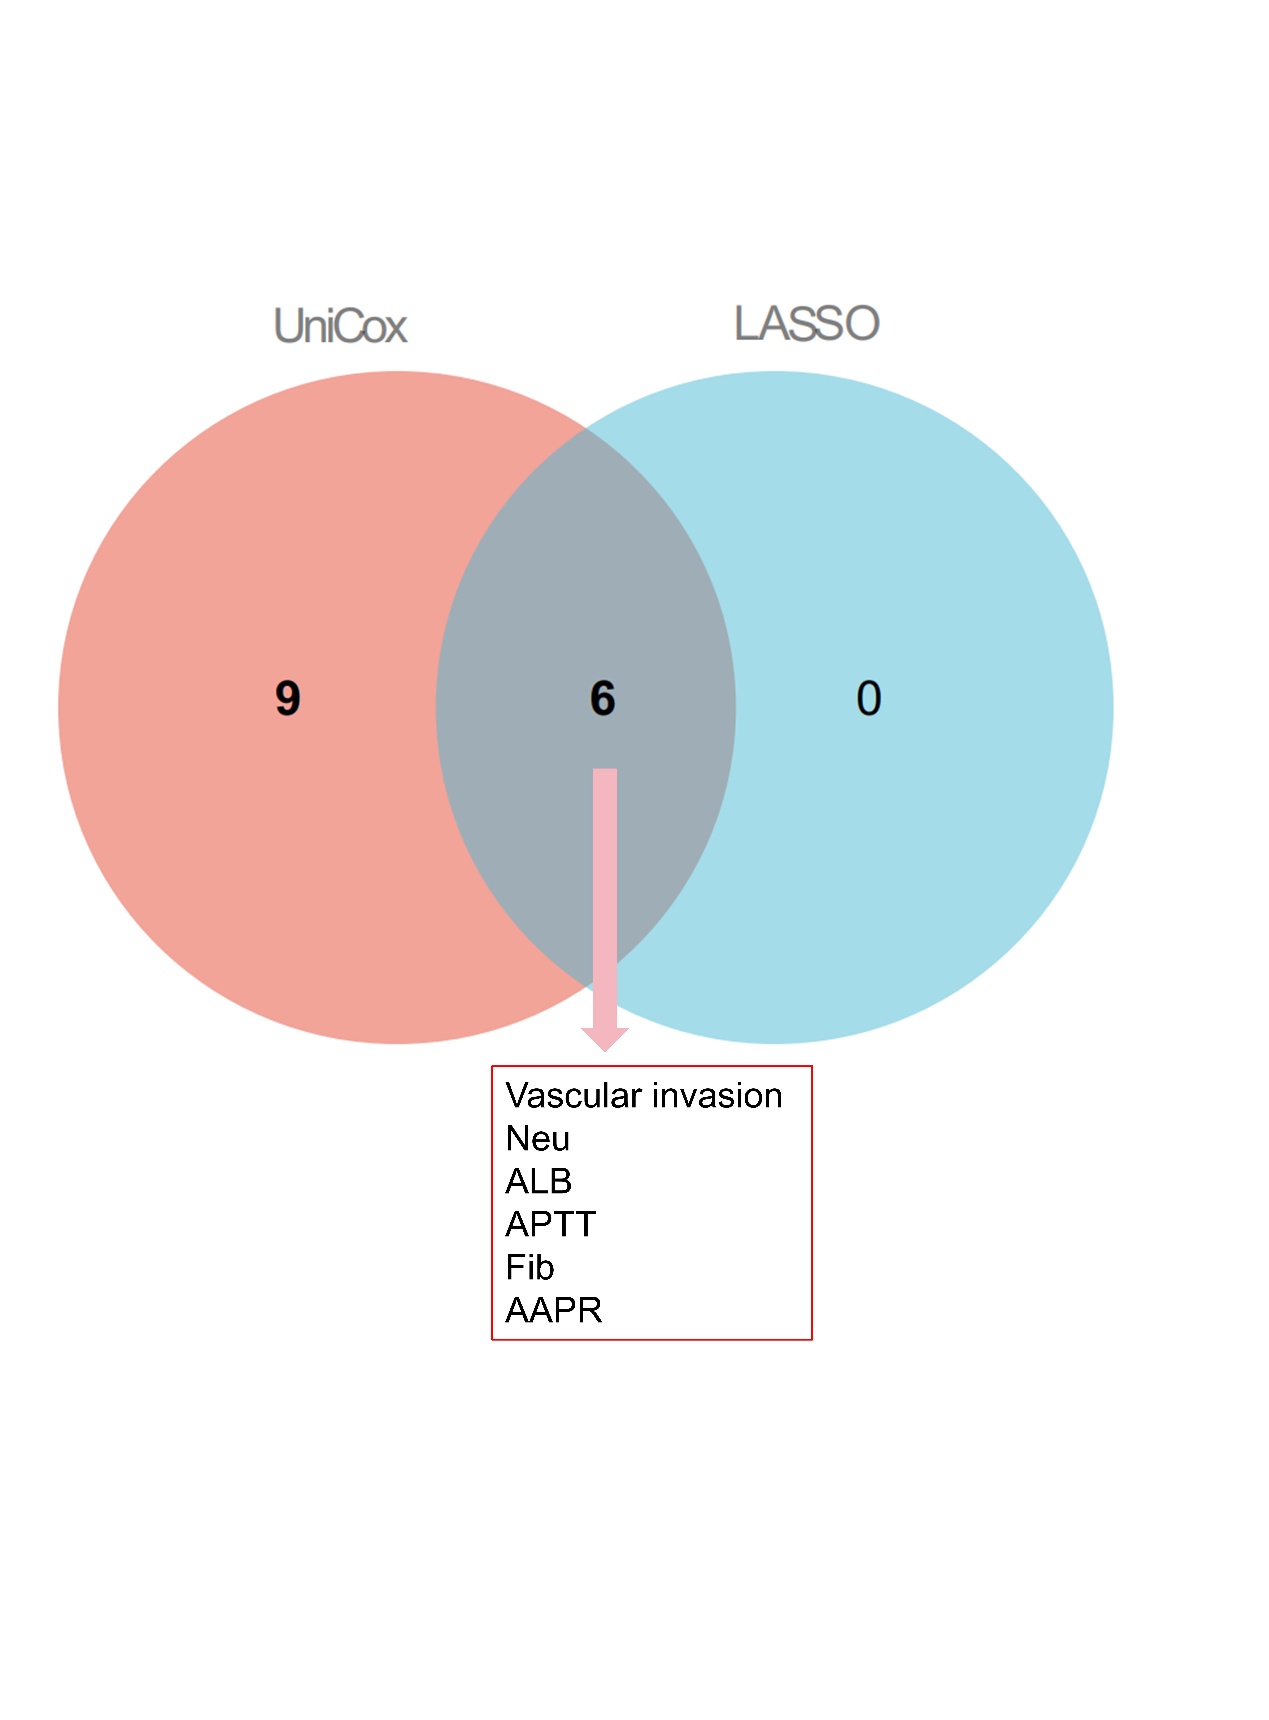


Abbreviations: UniCox, univariate Cox regression analysis; Neu, neutrophil count; LASSO, Least Absolute Shrinkage and Selection Operator; ALB, albumin; APTT, activated partial thromboplastin time; Fib, fibrinogen; AAPR, albumin-to-alkaline phosphatase ratio.

**Supplementary Figure S2**


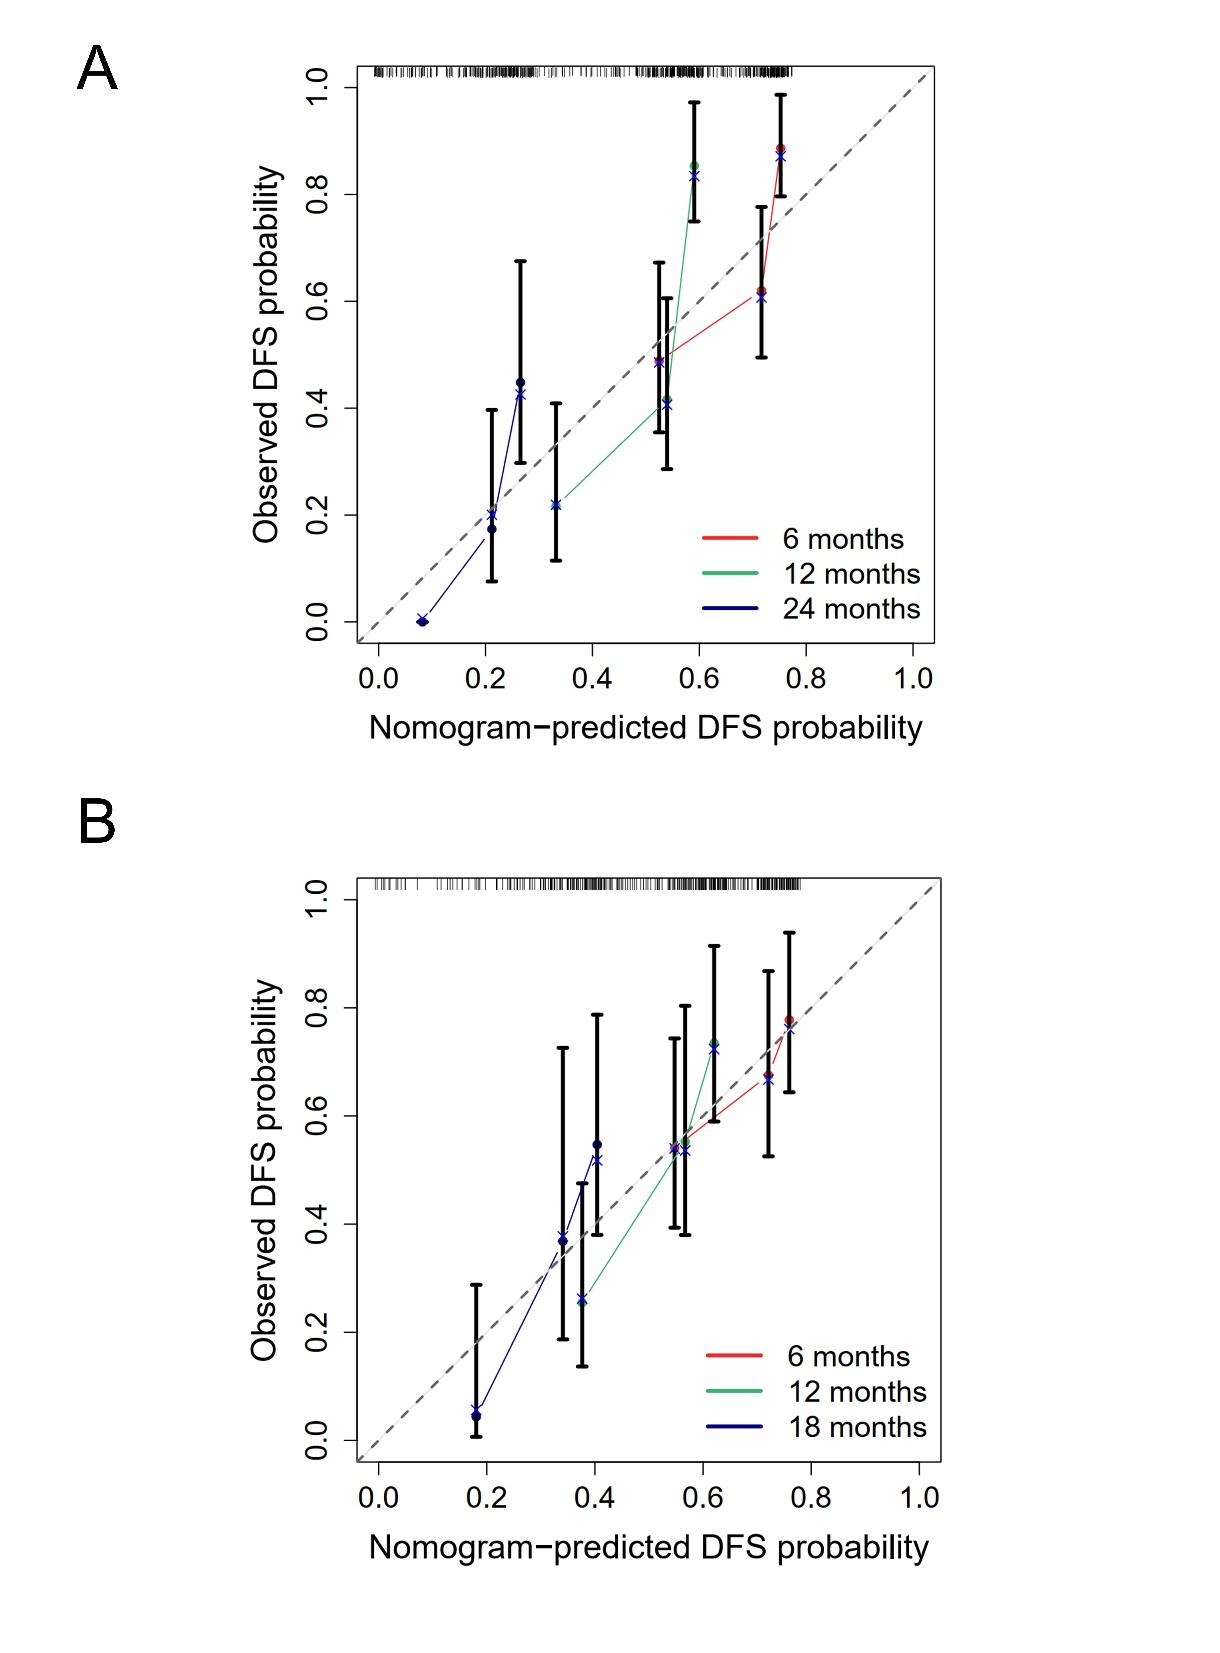


Abbreviations: DFS, disease-free survival.

**Supplementary Figure S3**


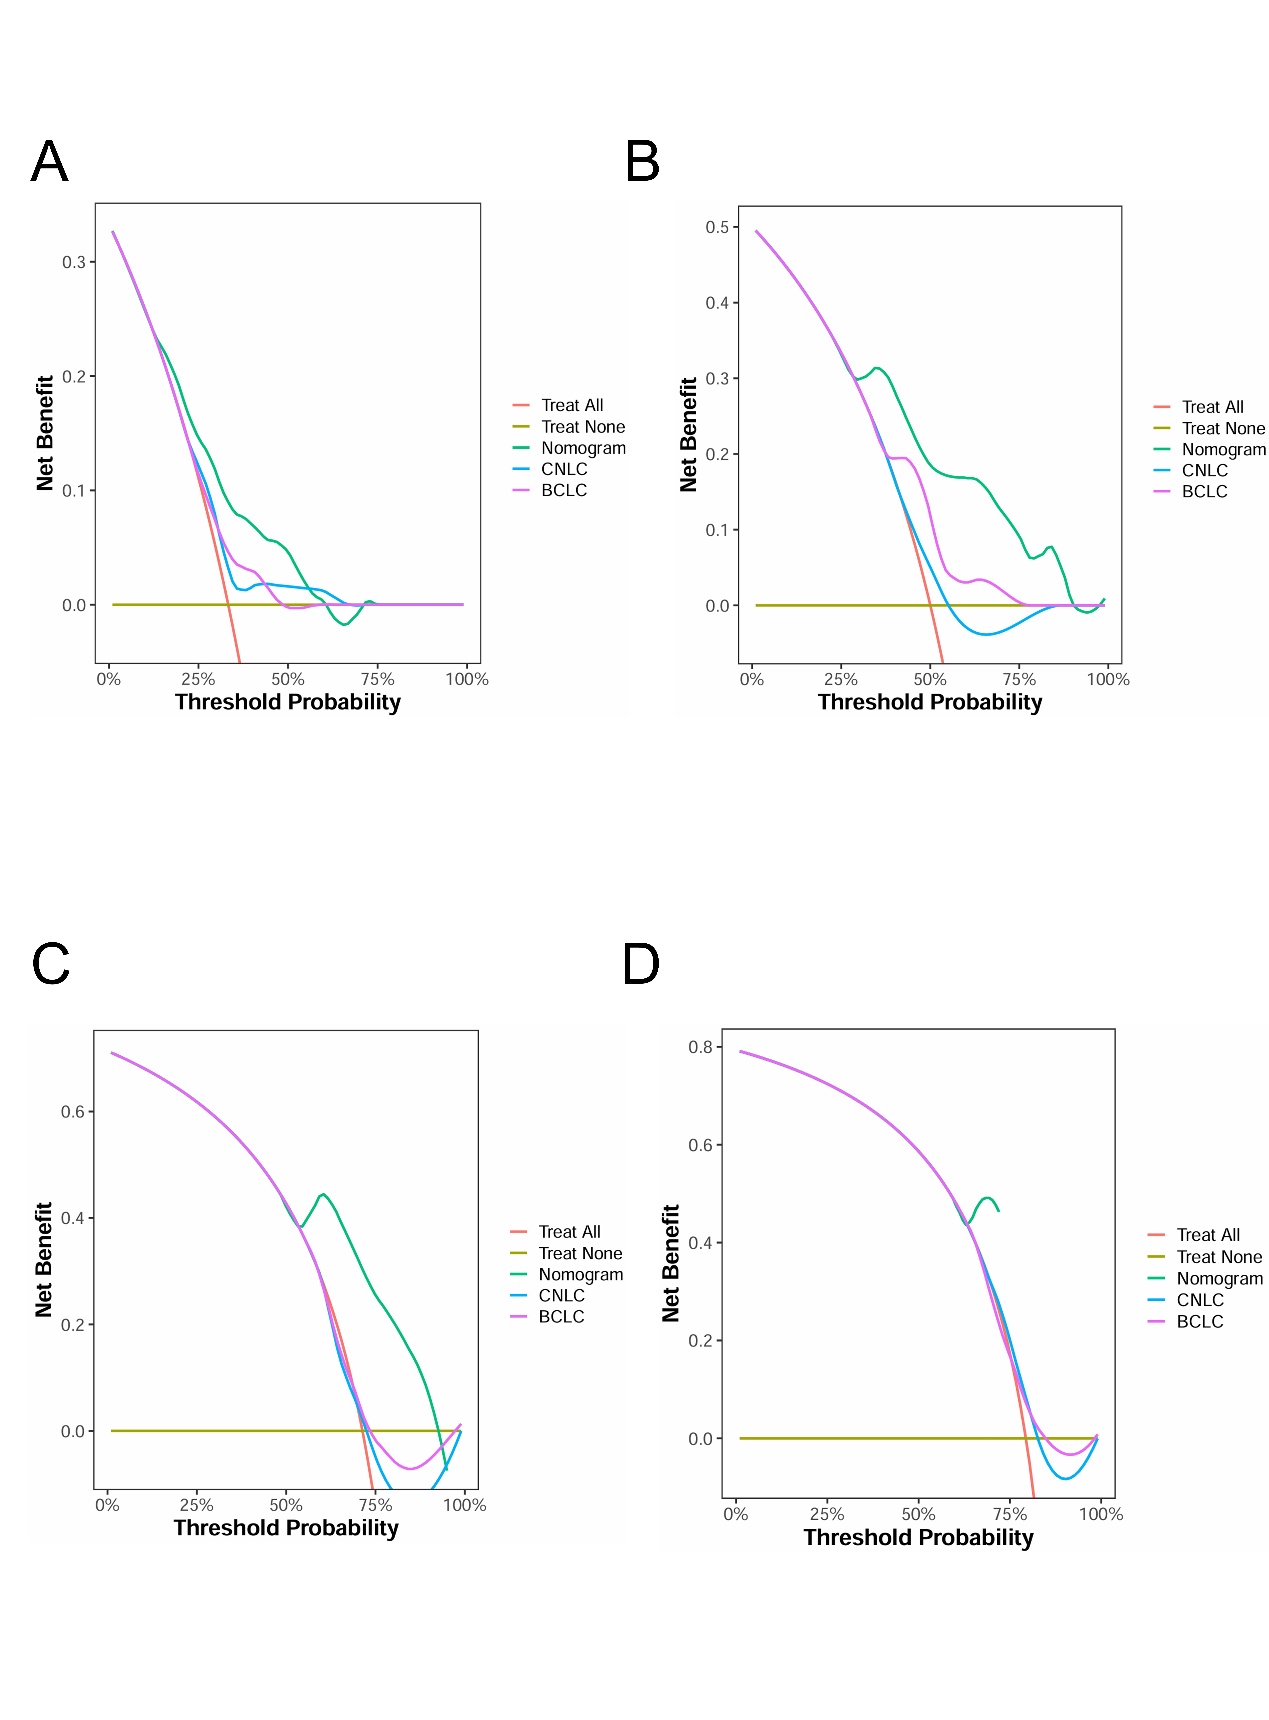


Abbreviations: Nomogram, nomogram score; BCLC, Barcelona Clinic Liver Cancer; CNLC, China Liver Cancer Staging.

Table S1: Head-to-head C-index data of the training set.

| Comparison | Delta C-index | CI lower | CI upper | P value |
| --- | --- | --- | --- | --- |
| Nomogram vs BCLC | 0.103 | 0.016 | 0.191 | 0.016 |
| Nomogram vs CNLC | 0.123 | 0.047 | 0.202 | 0.004 |

Abbreviations: Nomogram, nomogram score; BCLC, Barcelona Clinic Liver Cancer; CNLC, China Liver Cancer Staging, CI, confidence interval.

Table S2: Head-to-head C-index data of the validation set.

| Comparison | Delta C-index | CI lower | CI upper | P value |
| --- | --- | --- | --- | --- |
| Nomogram vs BCLC | 0.064 | -0.043 | 0.178 | 0.268 |
| Nomogram vs CNLC | 0.059 | -0.047 | 0.166 | 0.256 |

Abbreviations: Nomogram, nomogram score; BCLC, Barcelona Clinic Liver Cancer; CNLC, China Liver Cancer Staging, CI, confidence interval.
